# Supplementary figures and images for: The Genomic Organisation of the TRA/TRD Locus Validates the Peculiar Characteristics of Dromedary δ-Chain Expression
Source: MDPI journal article supplement (doi:10.3390/genes12040544), 2021-04-09

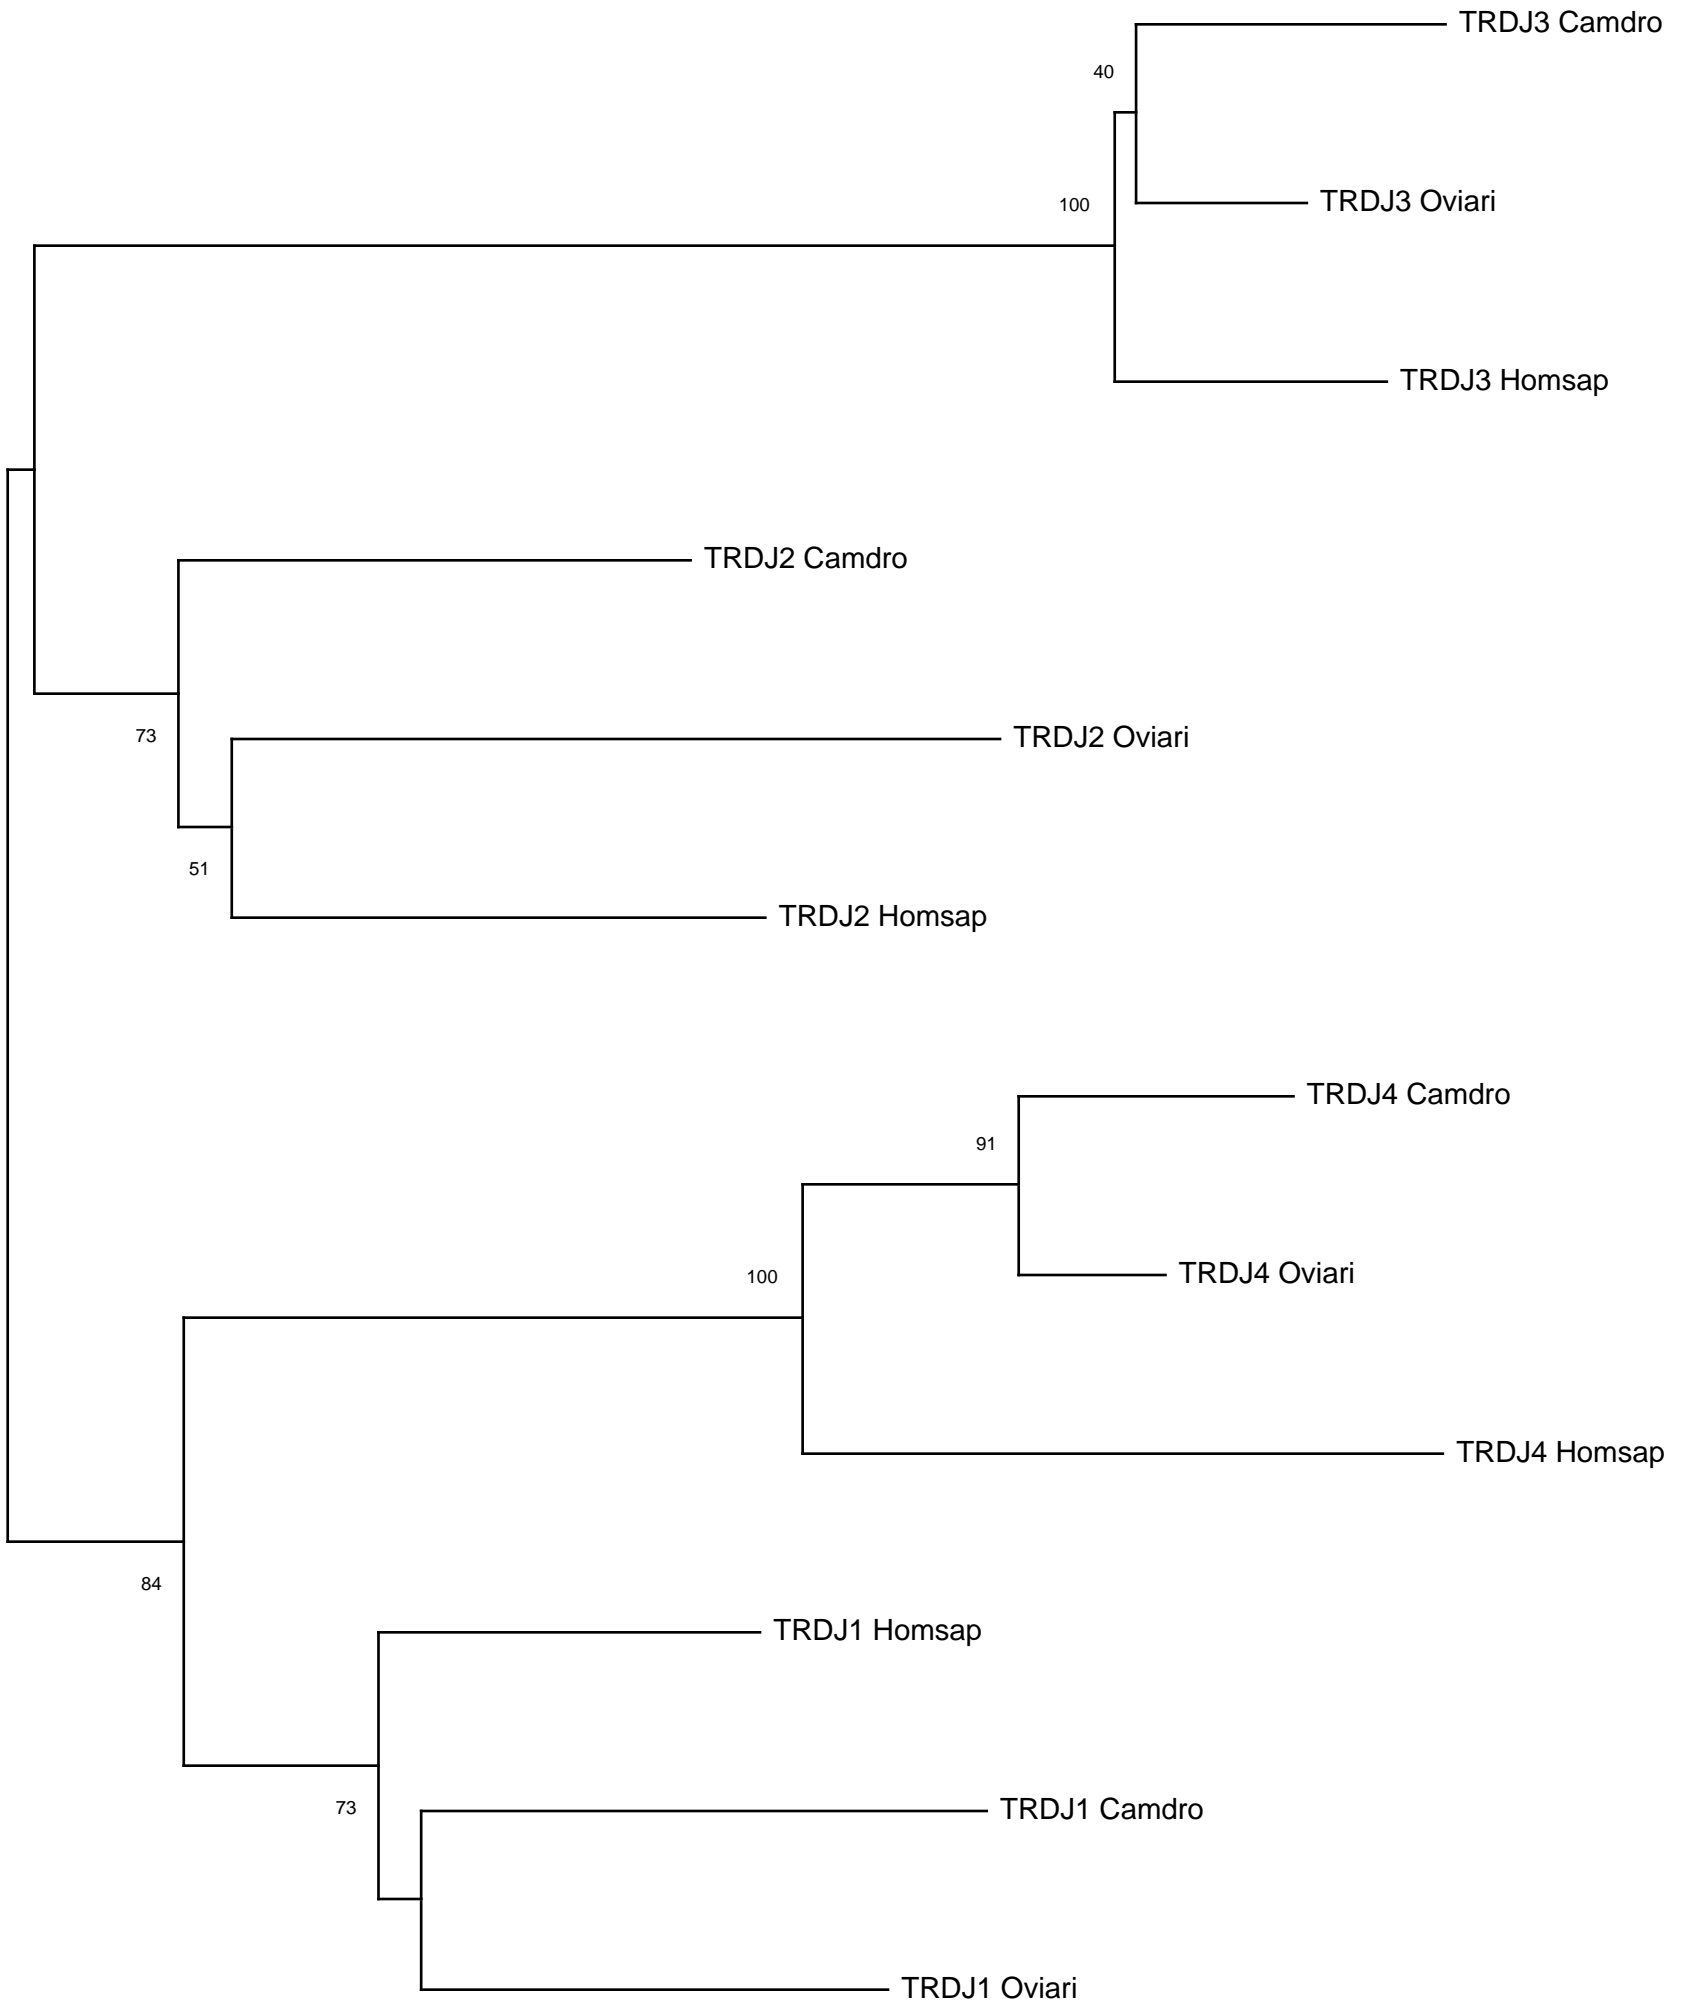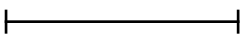

0.050

Supplement: s1 [file s1]

## RATIO P-N/TRDD

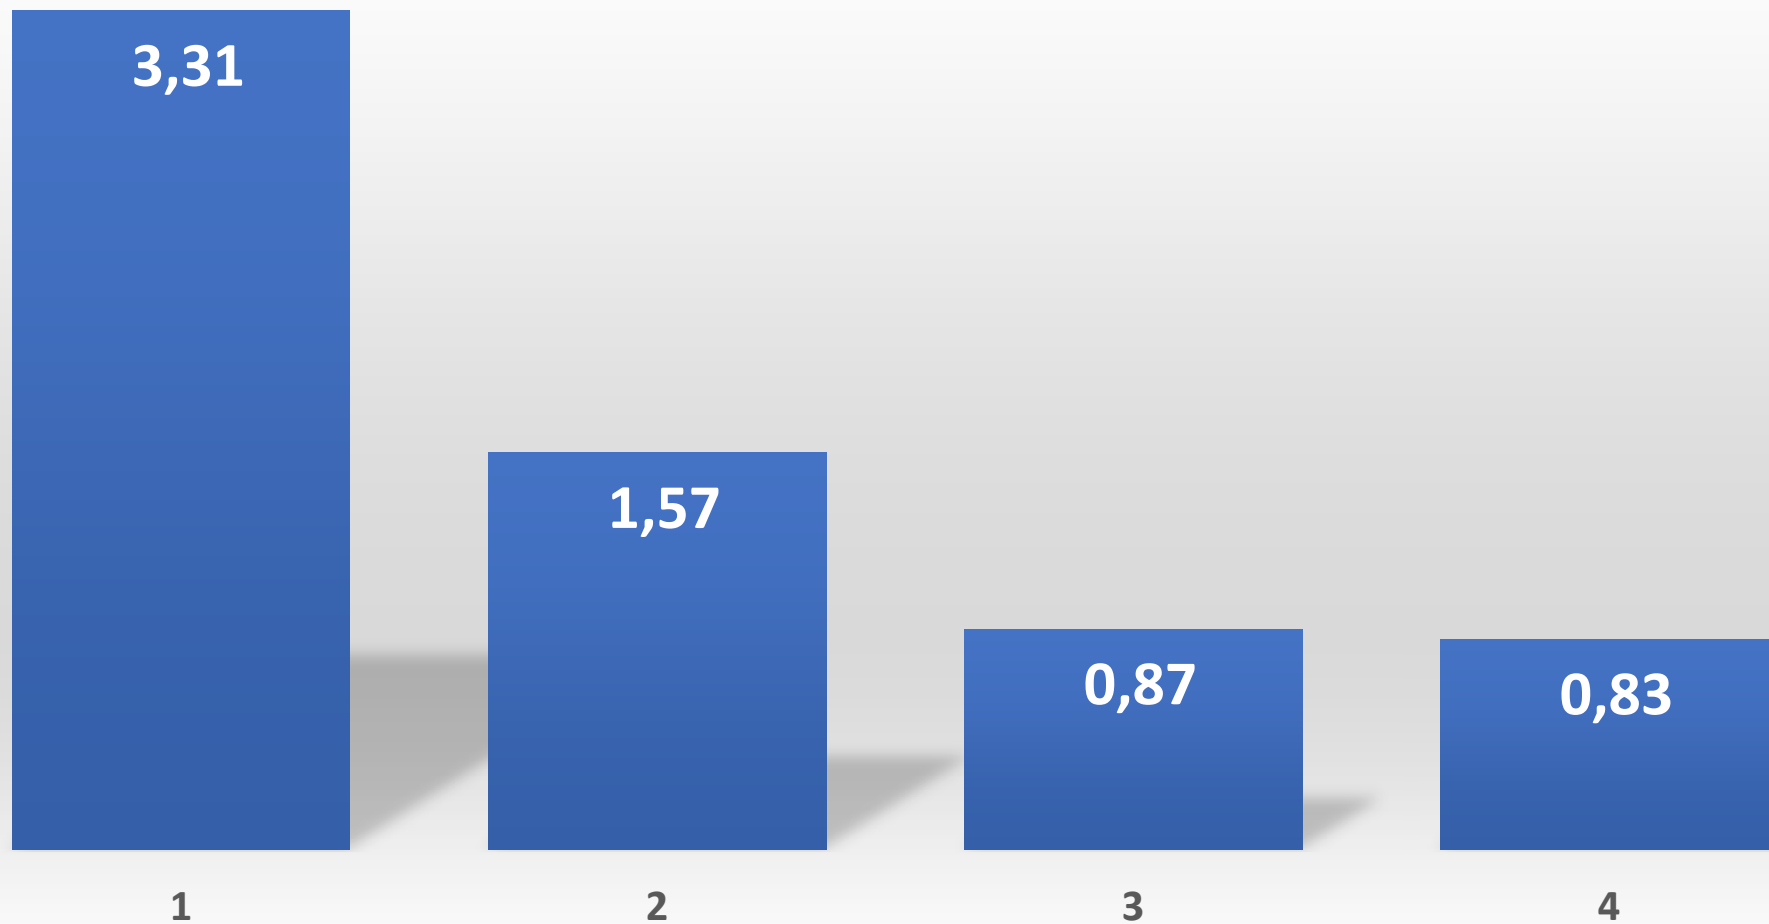

TRDD genes

Supplement: s1 [file s1]
